# Supplementary material for: SFTPC genetic polymorphisms are associated with tuberculosis susceptibility and clinical phenotype in a Western Chinese Han population
Source: PubMed Central journal article supplement — Exp Ther Med. 2020 Sep 17;20(5):100. doi: 10.3892/etm.2020.9230 (PMC7507020; doi:10.3892/etm.2020.9230), 2020-09-17
Supplement: Supplementary_Data.pdf [file Supplementary_Data.pdf]

Table SI. Characteristics of the candidate SNPs.

| SNP        | Function <sup>a</sup>             | HWE-P-value <sup>b</sup> | Minor allele | MAF     |       |
|------------|-----------------------------------|--------------------------|--------------|---------|-------|
|            |                                   |                          |              | Control | CHB   |
| rs1124     | Exonic splicing enhancer          | 0.381                    | A            | 0.325   | 0.296 |
| rs4715     | Exonic splicing enhancer          | 0.214                    | A            | 0.290   | 0.252 |
| rs8192309  | Transcription factor binding site | 0.493                    | G            | 0.155   | 0.175 |
| rs8192313  | Transcription factor binding site | 0.536                    | C            | 0.350   | 0.320 |
| rs13248346 | Transcription factor binding site | 0.487                    | A            | 0.209   | 0.311 |
| rs2070686  | Transcription factor binding site | 0.596                    | A            | 0.262   | 0.335 |
| rs4995702  | Transcription factor binding site | 0.001                    | A            | 0.347   | 0.296 |

<sup>a</sup>Predicted using SNPinfo method. <sup>b</sup>P-value of Hardy-Weinberg equilibrium tests in healthy controls. SNP, single nucleotide polymorphism; MAF, minor allele frequency; Control, the minor allele frequency in Chinese Han healthy controls in the present study; CHB, the minor allele frequency in the Chinese Han Beijing population based on the 1000 Genomes Project database.

Table SII. The genotype distributions between male and female in patients with tuberculosis.

| SNP        | Variant | Male, n (%) | Female, n (%) | P-value <sup>a</sup> |
|------------|---------|-------------|---------------|----------------------|
| rs1124     | AA      | 69 (12.85)  | 48 (13.41)    | 0.609                |
| G>A        | AG      | 237 (44.13) | 168 (46.93)   |                      |
|            | GG      | 231 (43.02) | 142 (39.66)   |                      |
| rs4715     | AA      | 50 (9.28)   | 32 (8.87)     | 0.954                |
| C>A        | AC      | 228 (42.30) | 156 (43.21)   |                      |
|            | CC      | 261 (48.42) | 173 (47.92)   |                      |
| rs8192309  | AA      | 11 (2.05)   | 10 (2.77)     | 0.407                |
| G>A        | AG      | 129 (24.02) | 97 (26.87)    |                      |
|            | GG      | 397 (73.93) | 254 (70.36)   |                      |
| rs8192313  | CC      | 88 (16.39)  | 50 (13.85)    | 0.067                |
| A>C        | CA      | 224 (41.71) | 180 (49.86)   |                      |
|            | AA      | 225 (41.90) | 131 (36.29)   |                      |
| rs13248346 | AA      | 32 (5.95)   | 18 (5.00)     | 0.928                |
| G>A        | AG      | 182 (33.83) | 124 (34.44)   |                      |
|            | GG      | 324 (60.22) | 218 (60.56)   |                      |
| rs2070686  | AA      | 37 (6.90)   | 17 (4.71)     | 0.200                |
| G>A        | AG      | 198 (36.94) | 147 (40.72)   |                      |
|            | GG      | 301 (59.16) | 197 (54.57)   |                      |

<sup>a</sup>P-value was calculated by  $\chi^2$  test. SNP, single nucleotide polymorphisms.
